# Supplementary material
Source: PubMed Central journal article supplement (PMC3457438)
Supplement: JCM.01174-12_zjm999091932so1.pdf [file JCM.01174-12_zjm999091932so1.pdf]

1 **Supplement**

2 Table S1: Distribution of *spa* types among isolates from colonization in 2004/05 and 2010/11

| spa-CC     | <i>spa</i> types of MRSA isolates 2004/05 (n = 1604) <sup>a</sup> |                                                                                       |                                                                                                |                                                                                       | <i>spa</i> types of MRSA isolates 2010/11 (n = 1603) <sup>a</sup> |                                                                                       |                                                                                       |                                                                                       | OR (95% CI) <sup>b</sup> | p-value <sup>b</sup> |
|------------|-------------------------------------------------------------------|---------------------------------------------------------------------------------------|------------------------------------------------------------------------------------------------|---------------------------------------------------------------------------------------|-------------------------------------------------------------------|---------------------------------------------------------------------------------------|---------------------------------------------------------------------------------------|---------------------------------------------------------------------------------------|--------------------------|----------------------|
|            | No. of isolates (%)                                               | Infection                                                                             | Carriage                                                                                       | Unknown                                                                               | No. of isolates (%)                                               | Infection                                                                             | Carriage                                                                              | Unknown                                                                               |                          |                      |
| spa-CC 003 | 946 (59.0)                                                        | t001,<br>t002,<br><u>t003</u> ,<br>t014,<br>t023,<br>t035,<br>t041,<br>t045,<br>t067, | t001,<br>t002,<br><u>t003</u> ,<br>t010,<br>t014,<br>t023,<br>t035,<br>t041,<br>t045,<br>t045, | t001,<br>t002,<br><u>t003</u> ,<br>t014,<br>t023,<br>t035,<br>t041,<br>t045,<br>t067, | 846 (52.8)                                                        | t001,<br>t002,<br><u>t003</u> ,<br>t014,<br>t035,<br>t041,<br>t045,<br>t067,<br>t151, | t001,<br>t002,<br><u>t003</u> ,<br>t014,<br>t041,<br>t045,<br>t151,<br>t481,<br>t264, | t001,<br>t002,<br><u>t003</u> ,<br>t014,<br>t045,<br>t105,<br>t264,<br>t481,<br>t504, | 0.78 (0.67– 0.9)         | 0                    |

|  |                                                                               |                                                                                         |                        |  |                                                                                                                                     |                                                                                                                                                               |                                                                                                                                                           |  |  |
|--|-------------------------------------------------------------------------------|-----------------------------------------------------------------------------------------|------------------------|--|-------------------------------------------------------------------------------------------------------------------------------------|---------------------------------------------------------------------------------------------------------------------------------------------------------------|-----------------------------------------------------------------------------------------------------------------------------------------------------------|--|--|
|  | t109,<br>t143,<br>t151,<br>t242,<br>t264,<br>t481,<br>t503,<br>t504,<br>t1125 | t067,<br>t105,<br>t151,<br>t179,<br>t481,<br>t504,<br>t820,<br>t892,<br>t1009,<br>t1018 | t105,<br>t264,<br>t837 |  | t264,<br>t456,<br>t481,<br>t504,<br>t1107,<br>t1227,<br>t1282,<br>t4417,<br>t6860,<br>t7449,<br>t7634,<br>t8358,<br>t8366,<br>t9549 | t634,<br>t1107,<br>t1227,<br>t1282, ,<br>t1623,<br>t4881,<br>t5856,<br>t7240,<br>t8361,<br>t8366,<br>t8379,<br>t8382,<br>t8988,<br>t9443,<br>t9447,<br>t9450, | t548,<br>t634,<br>t838,<br>t1227,<br>t1623,<br>t1708,<br>t2164,<br>t2516,<br>t3618,<br>t3948,<br>t4417,<br>t4881,<br>t6846,<br>t6860,<br>t7635,<br>t8039, |  |  |
|--|-------------------------------------------------------------------------------|-----------------------------------------------------------------------------------------|------------------------|--|-------------------------------------------------------------------------------------------------------------------------------------|---------------------------------------------------------------------------------------------------------------------------------------------------------------|-----------------------------------------------------------------------------------------------------------------------------------------------------------|--|--|

|               |              |                                                                                       |                                                                               |                                                  |          |                                                   |                                                   |                                                   |                   |       |
|---------------|--------------|---------------------------------------------------------------------------------------|-------------------------------------------------------------------------------|--------------------------------------------------|----------|---------------------------------------------------|---------------------------------------------------|---------------------------------------------------|-------------------|-------|
|               |              |                                                                                       |                                                                               |                                                  |          |                                                   | t9553                                             | t8381,<br>t8384                                   |                   |       |
| spa-CC<br>004 | 95 (5.9)     | <u>t004</u> ,<br>t040,<br>t061,<br>t065,<br>t344,<br>t533,<br>t553,<br>t750,<br>t1017 | <u>t004</u> ,<br>t029,<br>t040,<br>t065,<br>t553,<br>t911,<br>t1005,<br>t1016 | t004,<br>t065                                    | 18 (1.1) | t004,<br>t040,<br>t141                            | t004,<br>t7391                                    | <u>t004</u> ,<br>t040,<br>t266,<br>t330           | 0.18 (0.1– 0.3)   | 0     |
| spa-CC<br>008 | 147<br>(9.2) | <u>t008</u> ,<br>t009,<br>t024,<br>t197,<br>t305,                                     | <u>t008</u> ,<br>t009,<br>t024,<br>t051,<br>t063,                             | <u>t008</u> ,<br>t024,<br>t068,<br>t305,<br>t656 | 97 (6.1) | <u>t008</u> ,<br>t024,<br>t063,<br>t068,<br>t967, | <u>t008</u> ,<br>t024,<br>t063,<br>t121,<br>t304, | <u>t008</u> ,<br>t024,<br>t063,<br>t068,<br>t190, | 0.64 (0.48– 0.84) | 0.001 |

|               |          |                                                   |                                                   |                                           |          |                                                   |                                                    |                                                    |                        |      |
|---------------|----------|---------------------------------------------------|---------------------------------------------------|-------------------------------------------|----------|---------------------------------------------------|----------------------------------------------------|----------------------------------------------------|------------------------|------|
|               |          | t530                                              | t064,<br>t068,<br>t139,<br>t197,<br>t211,<br>t305 |                                           |          | t1617,<br>t1779                                   | t5160                                              | t197,<br>t1627,<br>t4133,<br>t8555                 |                        |      |
| spa-CC<br>011 | 4 (0.3)  | -                                                 | <u>t011</u> ,<br>t108                             | t011                                      | 86 (5.4) | t011,<br>t034,<br>t8377                           | <u>t011</u> ,<br>t034,<br>t108,<br>t1451,<br>t4395 | t011,<br><u>t034</u> ,<br>t108,<br>t1451,<br>t2576 | 22.68 (8.51–<br>85.49) | 0    |
| spa-CC<br>012 | 28 (1.8) | t018,<br>t030,<br><u>t037</u> ,<br>t253,<br>t425, | t018,<br><u>t030</u> ,<br>t037                    | t012,<br>t018,<br>t019,<br>t030,<br>t037, | 22 (1.4) | t012,<br>t018,<br>t019,<br>t030,<br><u>t037</u> , | t012,<br>t021,<br>t030                             | t019,<br>t030,<br>t037,<br>t122,<br>t318           | 0.78 (0.43– 1.43)      | 0.39 |

|        |        | t532          |               | t459          |        | <u>t318</u>   |        |               |                   |   |
|--------|--------|---------------|---------------|---------------|--------|---------------|--------|---------------|-------------------|---|
| spa-CC | 304    | t020,         | t020,         | <u>t032</u> , | 431    | t020,         | t005,  | t020,         | 1.57 (1.33– 1.87) | 0 |
| 032    | (19.0) | t022,         | t022,         | t294,         | (26.9) | t022,         | t016,  | t022,         |                   |   |
|        |        | <u>t032</u> , | <u>t032</u> , | t431,         |        | <u>t032</u> , | t020,  | t025,         |                   |   |
|        |        | t294,         | t290,         | t476,         |        | t223,         | t022,  | <u>t032</u> , |                   |   |
|        |        | t417,         | t431,         | t613,         |        | t379,         | t032,  | t379,         |                   |   |
|        |        | t431,         | t531,         | t749,         |        | t431,         | t223,  | t531,         |                   |   |
|        |        | t432,         | t554,         | t794,         |        | t432,         | t307,  | t578,         |                   |   |
|        |        | t513,         | t578,         | t907,         |        | t578,         | t541,  | t608,         |                   |   |
|        |        | t515,         | t613,         | t1015         |        | t651,         | t578,  | t670,         |                   |   |
|        |        | t613,         | t765,         |               |        | t785,         | t646,  | t849,         |                   |   |
|        |        | t885,         | t904,         |               |        | t790,         | t785,  | t852,         |                   |   |
|        |        | t906,         | t907,         |               |        | t849,         | t1015, | t904,         |                   |   |
|        |        | t910          | t910          |               |        | t1015,        | t1036, | t910,         |                   |   |
|        |        |               |               |               |        | t1302,        | t1139, | t1275,        |                   |   |
|        |        |               |               |               |        | t1328,        | t1214, | t1499,        |                   |   |

|  |  |  |  |  |  |                                                                                                                                                              |                                                                                                                                                              |                                                                                                                                                              |  |  |
|--|--|--|--|--|--|--------------------------------------------------------------------------------------------------------------------------------------------------------------|--------------------------------------------------------------------------------------------------------------------------------------------------------------|--------------------------------------------------------------------------------------------------------------------------------------------------------------|--|--|
|  |  |  |  |  |  | t1499,<br>t1733,<br>t2251,<br>t2369,<br>t2373,<br>t2518,<br>t3139,<br>t3561,<br>t3721,<br>t4217,<br>t4762,<br>t6014,<br>t6736,<br>t8221,<br>t8363,<br>t8364, | t1275,<br>t2373,<br>t2834,<br>t4184,<br>t4217,<br>t4450,<br>t4582,<br>t5628,<br>t6736,<br>t8359,<br>t8365,<br>t8371,<br>t8374,<br>t8376,<br>t8383,<br>t8557, | t1616,<br>t2231,<br>t2369,<br>t2373,<br>t2477,<br>t2533,<br>t2818,<br>t4217,<br>t4424,<br>t6736,<br>t8367,<br>t8368,<br>t8372,<br>t8380,<br>t8558,<br>t8559, |  |  |
|--|--|--|--|--|--|--------------------------------------------------------------------------------------------------------------------------------------------------------------|--------------------------------------------------------------------------------------------------------------------------------------------------------------|--------------------------------------------------------------------------------------------------------------------------------------------------------------|--|--|

|               |         |      |               |      |                 |                                                                                                                     |                                                                   |                                               |                       |      |
|---------------|---------|------|---------------|------|-----------------|---------------------------------------------------------------------------------------------------------------------|-------------------------------------------------------------------|-----------------------------------------------|-----------------------|------|
|               |         |      |               |      |                 | t8368,<br>t8370,<br>t8373,<br>t8374,<br>t8380,<br>t9169,<br>t9174,<br>t9176,<br>t9177,<br>t9178,<br>t9445,<br>t9550 | t9167,<br>t9171,<br>t9175,<br>t9179,<br>t9444,<br>t9548,<br>t9552 | t8563,<br>t8832,<br>t9446,<br>t9448,<br>t9551 |                       |      |
| spa-CC<br>127 | 4 (0.3) | t127 | t127,<br>t321 | t127 | <u>10 (0.6)</u> | t127                                                                                                                | t114,<br>t127,<br>t177                                            | -                                             | 2.51 (0.72–<br>10.99) | 0.12 |
| spa-CC        | 1 (0.1) | t148 | -             | -    | <b>4 (0.3)</b>  | t791                                                                                                                | t148,                                                             | t4897                                         | 4.01 (0.40–           | 0.22 |

|                     |          |                                          |       |       |                |                                 |       |                 |                        |      |
|---------------------|----------|------------------------------------------|-------|-------|----------------|---------------------------------|-------|-----------------|------------------------|------|
| 148                 |          |                                          |       |       |                |                                 | t4100 |                 | 197.42)                |      |
| spa-CC<br>186       | 2 (0.1)  | t186,<br>t786                            | -     | -     | 3 (0.2)        | -                               | t7656 | t690,<br>t692   | 1.5 (0.17– 18.00)      | 0.69 |
| spa-CC<br>355/4741  | 1 (0.1)  | t015,<br>t038,<br>t069,<br>t161,<br>t230 | t355  | -     | 3 (0.2)        | t4741                           | t355  | -               | 3.01 (0.24–<br>157.76) | 0.38 |
| spa-CC<br>5397/8556 |          | -                                        | -     | -     | <u>2 (0.1)</u> | t015,<br>t031,<br>t038,<br>t740 | -     | t5397,<br>t8556 | Inf (0.19– Inf)        | 0.25 |
| spa-CC<br>934/044   | 9 (0.6)  | t044,<br>t882                            | t044  | -     | 8 (0.5)        | t044,<br>t203,<br>t934          | t044  | t044            | 0.89 (0.30– 2.60)      | 0.81 |
| spa-CC              | 32 (2.0) | -                                        | t015, | t015, | 20 (1.3)       | -                               | t739, | t015,           | 0.62 (0.33– 1.12)      | 0.09 |



|            |          |                         |                                 |                         |                 |                                                               |                                                                                   |                                                        |    |    |
|------------|----------|-------------------------|---------------------------------|-------------------------|-----------------|---------------------------------------------------------------|-----------------------------------------------------------------------------------|--------------------------------------------------------|----|----|
| 6704       |          |                         | t038,<br>t050,<br>t630,<br>t740 | t038,<br>t1008,<br>t556 |                 |                                                               | t950,<br>t5599,<br>t8357                                                          | t038,<br>t655,<br>t2469,<br>t6704                      |    |    |
| Singletons | 8 (0.5)  | t358,<br>t471,<br>t843  | t007,<br>t160,<br>t512          | t007,<br>t091           | 24 (1.5)        | t091,<br>t160,<br>t437,<br>t6257,<br>t657,<br>t7239,<br>t7470 | t091,<br>t283,<br>t437,<br>t843,<br>t6548,<br>t8038,<br>t8362,<br>t8375,<br>t8378 | t189,<br>t1430,<br>t8554,<br>t8829,<br>t9170,<br>t9172 | NA | NA |
| Excluded   | 21 (1.3) | t026,<br>t322,<br>t457, | t132,<br>t282,<br>t288,         | t132,<br>t362,<br>t535, | <u>20 (1.3)</u> | t026,<br>t457,<br>t458,                                       | t463,<br>t2642,<br>t3050                                                          | t027,<br>t463,<br>t535                                 | NA | NA |

|        |         |                 |                                |                          |         |                                            |                 |                 |    |    |
|--------|---------|-----------------|--------------------------------|--------------------------|---------|--------------------------------------------|-----------------|-----------------|----|----|
|        |         | t502,<br>t693   | t362,<br><u>t457</u> ,<br>t463 | t808,<br>t1007,<br>t1011 |         | t463,<br>t535,<br>t586,<br>t1372,<br>t2860 |                 |                 |    |    |
| Others | 2 (0.1) | not<br>typeable | -                              | not<br>typeable          | 9 (0.6) | not<br>typeable                            | not<br>typeable | not<br>typeable | NA | NA |

3 <sup>a</sup> predominant *spa* types are underlined

4 <sup>b</sup> Comparison of all isolates (infection, carriage, unknown) of the respective *spa*-CC from 2004/05 and 2010/11
